# Supplementary material
Source: publisher figshare collection journal article supplement (https://future-science-group.figshare.com/ndownloader/files/28413198)
Supplement: Supplementary file 1 [file 28413198]

| **Supplementary Table 1 Clinicopathologic features of 5 patients used for RNA-seq** | | | | | |
| --- | --- | --- | --- | --- | --- |
| **Patient ID** | 1 | 2 | 3 | 4 | 5 |
| **Age** | 67 | 59 | 51 | 44 | 60 |
| **Gender** | Male | Male | Male | Male | Male |
| **Hepatitis B virus infection** | Positive | Negative | Positive | Positive | Positive |
| **Liver cirrhosis** | Yes | Yes | Yes | No | Yes |
| **Serum AFP level** | ≥20 ng/ml | <20 ng/ml | <20 ng/ml | ≥20 ng/ml | ≥20 ng/ml |
| **Vascular invasion** | Absent | Absent | Absent | Absent | Present |
| **Tumor number** | 1 | 1 | 1 | 1 | 3 |
| **Tumor size (cm)** | 5.5*4*4 | 8*7*5.5 | 8.5*8*7 | 10*9.5*8 | 8*7*6.5 |
| **TNM stage** | Ⅰ | Ⅰ | Ⅰ | Ⅱ | ⅢA |
| **Edmondson stage** | II | II | II | Ⅲ | Ⅲ |
